# Supplementary material for: Revealing the CO2 adsorption blocking mechanism in flexible low-silica small-pore zeolites via three-dimensional electron diffraction
Source: Royal Society of Chemistry journal article supplement (doi:10.1039/d4cc06791f), 2025-01-01
Supplement: d4cc06791f1.pdf [file d4cc06791f1.pdf]

## Supporting Information

### Revealing CO<sub>2</sub> Adsorption Blocking Mechanism in Flexible Low-Silica Small-pore Zeolites via Three- Dimensional Electron Diffraction

Jian Guo<sup>a,b</sup>, Chenyang Nie<sup>b,c</sup>, Shitai Li<sup>b,c</sup>, Nana Yan<sup>b\*</sup>, Peng Guo<sup>b,c\*</sup>, Zhongmin  
Liu<sup>a,b,c</sup>

- a. Henan Institute of Advanced Technology, Zhengzhou University, Zhengzhou 450001, China.
- b. National Engineering Research Center of Lower-Carbon Catalysis Technology, Dalian Institute of Chemical Physics, Chinese Academy of Sciences, Dalian 116023, Liaoning, China.
- c. University of Chinese Academy of Sciences, Beijing 100049, China.

## Materials

Aluminium hydroxide (99.6 %, Aladdin Chemistry Co., Ltd.), Ludox HS-40 (40 %, Aldrich; suspension in water), Sodium hydroxide (98 %, Aladdin Chemistry Co., Ltd.), NaY zeolites (Nankai University Catalyst Co., Ltd), Potassium hydroxide (85 %, Damao Chemical Reagent Factory), Sodium chloride (Tianjin Fuchen Chemical Reagent Factory), Potassium chloride (Guangdong Guanghua Sci-Tech Co., Ltd). All reagents were used without purification.

## Zeolites synthesis and Ion-exchange

The synthesis of Na-GIS was based on a reported recipe in the literature,<sup>1</sup> with some modifications. In the typical synthesis of Na-GIS, 0.98 g NaOH was added to 6.65 g deionized water and stirred to dissolve. Then, 0.20 g Al(OH)<sub>3</sub> was added and stirred for 1 h. Subsequently, 1.54 g Ludox HS-40 was added and stirred overnight to form a homogeneous gel with a molar ratio of 4.68Na<sub>2</sub>O: 1.0Al<sub>2</sub>O<sub>3</sub>:8 SiO<sub>2</sub>:184 H<sub>2</sub>O. The gel was transferred into a 50 mL Teflon-lined stainless-steel autoclave and crystallized at 100 °C under rotation at 50 rpm for 72 h. The final Na-GIS was obtained by centrifugation, repeated washing with deionized water, and drying at 100 °C overnight.

K-GIS was prepared by ion exchange of Na-GIS. Na-GIS was fully converted to the K form using 1 M KCl solution at room temperature for 4 h, repeated three times. The resulting K-GIS was obtained by centrifugation, repeated washing with deionized water, and drying at 100 °C overnight.

**PHI**-type zeolite was synthesized using both K<sup>+</sup> and Na<sup>+</sup> ions. Specifically, 0.12 g NaOH and 0.12 g KOH were dissolved in 2.28 g deionized water, followed by the addition of 0.72 g NaY zeolite. The mixture was stirred for 5 h, forming a uniform gel with a molar ratio of 1.8Na<sub>2</sub>O: 0.6K<sub>2</sub>O: 1.0Al<sub>2</sub>O<sub>3</sub>:5 SiO<sub>2</sub>:81.3 H<sub>2</sub>O. This gel was transferred into a 50 mL Teflon-lined stainless-steel autoclave and crystallized at 100 °C for 72 h. The final product was obtained by centrifugation, repeated washing with deionized water, and drying at 100 °C overnight.

Na-PHI and K-PHI were prepared by ion exchange of the above **PHI** zeolite. The zeolite was exchanged into the Na or K form using 1 M NaCl or KCl solution, respectively. K-PHI was prepared by two exchanges at room temperature, each lasting 6 h, while Na-PHI was prepared by seven exchanges at 80 °C, each also lasting 6 h. The final products were obtained by centrifugation, repeated washing with deionized water, and drying at 100 °C overnight. After the exchange, Na-PHI still contained a small amount of K<sup>+</sup> (Table S1), but all ions were treated as Na<sup>+</sup> during structural refinement.

## Characterization

PXRD data were collected using a PANalytical X'Pert PRO X-ray diffractometer (Cu K $\alpha$ ,  $\lambda = 1.5418 \text{ \AA}$ ) for phase analysis. SEM images were taken through a Hitachi SU8020 microscope. Chemical composition was determined using a PANalytical Axios advanced X-ray Fluorescence Spectrometer. CO<sub>2</sub>, N<sub>2</sub> and CH<sub>4</sub> adsorption/desorption isotherms were performed on a Micrometrics 3FLEX instrument. Before tests, all the samples were degassed at 350 °C for 4 h under vacuum. Isotherms were measured at 25 °C and the equilibration interval of each point was set to 40 s.

## Structural Analysis

cRED data were collected on a JEOL 2100 Plus TEM equipped with an ASI Cheetah120 detector. The raw data were analyzed using the X-ray Detector Software (XDS)<sup>2</sup>. The initial structural models were solved by using SHELXT<sup>3</sup>, and the subsequent determination of cation locations and structure refinement were conducted by using SHELXL<sup>3</sup>.

## Theoretical calculation

The molecular dynamics annealing simulations<sup>4</sup> were performed by placing 19 CO<sub>2</sub> molecules into 2×2×2 unit cells. The Universal Force Field was used for the simulation. The annealing process was conducted with a maximum temperature of 227 °C and a target temperature of 27 °C for a total of 50 cycles, with five ramps performed in each cycle. Each ramp allowed 100 dynamic steps, for a total of 50,000 steps.

## Breakthrough experiments

Breakthrough experiments for CO<sub>2</sub>/CH<sub>4</sub> and CO<sub>2</sub>/N<sub>2</sub> mixtures were performed on BSD-MAB instrument from Beishide Instrument Technology (Beijing) Co., Ltd. The samples were loaded into the quartz tube with a diameter of 2 mm. Before tests, the samples were activated at 350 °C under vacuum for 4 h. All tests were carried out at 25 °C and 1bar with a flow rate of 5 mL/min. Argon (5 ml/min) was used as the reference gas to stabilize the gas flow and was directed through a separate tube, bypasses the sample bed. The outlet gas mixture was detected by a mass spectrometer.

## Table of Contents

|                                                                                                                                                                                                 |     |
|-------------------------------------------------------------------------------------------------------------------------------------------------------------------------------------------------|-----|
| Table S1. Chemical compositions of four types of zeolites in this work measured by XRF.                                                                                                         | S5  |
| Table S2. The cRED details of structural refinement for Na-GIS-DH.                                                                                                                              | S6  |
| Table S3. The cRED details of structural refinement for K-GIS-DH.                                                                                                                               | S7  |
| Table S4. Breakthrough results of CO <sub>2</sub> /CH <sub>4</sub> (5/95, v/v) and CO <sub>2</sub> /N <sub>2</sub> (15/85, v/v) on K-GIS at 25 °C and 1 bar with a total flow rate of 5 ml/min. | S8  |
| Table S5. The cRED details of structural refinement for Na-PHI-DH.                                                                                                                              | S9  |
| Table S6. The ion occupancy and multiplicity at different 8-rings in PHI-type zeolites.                                                                                                         | S10 |
| Table S7. The cRED details of structural refinement for K-PHI-DH.                                                                                                                               | S11 |

## Figures

|                                                                                                                                                                                                                                                    |     |
|----------------------------------------------------------------------------------------------------------------------------------------------------------------------------------------------------------------------------------------------------|-----|
| Fig. S1. (a) PXRD patterns of <b>GIS</b> -type zeolites. (b) SEM image of as-synthesized Na-GIS.                                                                                                                                                   | S12 |
| Fig. S2. (a) 3D reciprocal lattice of K-GIS-DH. (b-d) Three slices <i>hk0</i> , <i>0kl</i> , and <i>hhl</i> extracted from the reconstructed reciprocal lattice.                                                                                   | S12 |
| Fig. S3. CO <sub>2</sub> adsorption sites in K-GIS by theoretical calculation.                                                                                                                                                                     | S13 |
| Fig. S4. Experimental binary breakthrough curves for a gas mixture of CO <sub>2</sub> /N <sub>2</sub> (15/85, v/v) (left) and CO <sub>2</sub> /CH <sub>4</sub> (5/95, v/v) (right) on K-GIS at 25 °C and 1 bar with a total flow rate of 5 ml/min. | S13 |
| Fig. S5. (a) The PXRD patterns of <b>PHI</b> -type zeolites. (b) SEM image of as-synthesized PHI.                                                                                                                                                  | S14 |
| Fig. S6. The tiling structure of idealized <b>PHI</b> -type framework (left), <i>oto</i> and <i>phi</i> CBUs (middle), 8-ring pore openings (right).                                                                                               | S14 |
| Fig. S7. (a) 3D reciprocal lattice of Na-PHI-DH. (b-d) Three slices <i>hk0</i> , <i>0kl</i> , and <i>h0l</i> extracted from the reconstructed reciprocal lattice.                                                                                  | S15 |
| Fig. S8. (a) 3D reciprocal lattice of K-PHI-DH. (b-d) Three slices <i>hk0</i> , <i>0kl</i> , and <i>h0l</i> extracted from the reconstructed reciprocal lattice.                                                                                   | S15 |
| Fig. S9. N <sub>2</sub> (left) and CH <sub>4</sub> (right) adsorption isotherms of K-GIS (brown) and K-PHI (red) at 25 °C.                                                                                                                         | S16 |

Table S1. Chemical compositions of four types of zeolites in this work measured by XRF.

| Samples | Unit cell compositions                                                          |
|---------|---------------------------------------------------------------------------------|
| Na-GIS  | $ \text{Na}_{5.8} [\text{Si}_{10.2}\text{Al}_{5.8}\text{O}_{32}]$               |
| K-GIS   | $ \text{K}_{5.8} [\text{Si}_{10.2}\text{Al}_{5.8}\text{O}_{32}]$                |
| Na-PHI* | $ \text{Na}_{5.5}\text{K}_{0.4} [\text{Si}_{10.1}\text{Al}_{5.9}\text{O}_{32}]$ |
| K-PHI   | $ \text{K}_{5.8} [\text{Si}_{10.2}\text{Al}_{5.8}\text{O}_{32}]$                |

\* : Na-PHI contained a small amount of  $\text{K}^+$  ions , which were ignored during the structural refinement process.

Table S2. The cRED details of structural refinement for Na-GIS-DH.

| Sample                                      | Na-GIS-DH  |
|---------------------------------------------|------------|
| Tilt range (°)                              | -43~64.9   |
| Exposure time/frame (s)                     | 0.3        |
| Number of frames                            | 244        |
| Crystal system                              | Tetragonal |
| Space group                                 | $P4_12_12$ |
| $a$ (Å)                                     | 9.6        |
| $b$ (Å)                                     | 9.6        |
| $c$ (Å)                                     | 8.9        |
| $\alpha$ (°)                                | 90.0       |
| $\beta$ (°)                                 | 90.0       |
| $\gamma$ (°)                                | 90.0       |
| $V$ (Å <sup>3</sup> )                       | 823.7      |
| Resolution (Å)                              | 0.84       |
| Completeness (%)                            | 99.6       |
| $R_{int}$ (%)                               | 16.29      |
| Unique Reflections $F_o > 4\text{sig}(F_o)$ | 423        |
| Parameters                                  | 67         |
| Restraints                                  | 67         |
| $R_1$                                       | 0.1292     |
| GOF                                         | 1.111      |
| CCDC number                                 | 2385940    |

Table S3. The cRED details of structural refinement for K-GIS-DH.

| Sample                                      | K-GIS-DH   |
|---------------------------------------------|------------|
| Tilt range (°)                              | -59.9~62.1 |
| Exposure time/frame (s)                     | 0.3        |
| Number of frames                            | 272        |
| Crystal system                              | Tetragonal |
| Space group                                 | $I4_1/a$   |
| $a$ (Å)                                     | 9.7        |
| $b$ (Å)                                     | 9.7        |
| $c$ (Å)                                     | 9.4        |
| $\alpha$ (°)                                | 90.0       |
| $\beta$ (°)                                 | 90.0       |
| $\gamma$ (°)                                | 90.0       |
| $V$ (Å <sup>3</sup> )                       | 891.9      |
| Resolution (Å)                              | 0.84       |
| Completeness (%)                            | 99.5       |
| $R_{int}$ (%)                               | 14.97      |
| Unique Reflections $F_o > 4\text{sig}(F_o)$ | 260        |
| Parameters                                  | 39         |
| Restraints                                  | 1          |
| $R_1$                                       | 0.1222     |
| GOF                                         | 1.183      |
| CCDC number                                 | 2385938    |

Table S4. Breakthrough results of CO<sub>2</sub>/CH<sub>4</sub> (5/95, v/v) and CO<sub>2</sub>/N<sub>2</sub> (15/85, v/v) on K-GIS at 25 °C and 1 bar with a total flow rate of 5 ml/min.

| Binary mixture                   | Saturated Adsorption Capacity (mmol/g) |                |                 | Separation Coefficient |
|----------------------------------|----------------------------------------|----------------|-----------------|------------------------|
|                                  | CO <sub>2</sub>                        | N <sub>2</sub> | CH <sub>4</sub> |                        |
| CO <sub>2</sub> /N <sub>2</sub>  | 1.8                                    | 0.2            | -               | 50.7                   |
| CO <sub>2</sub> /CH <sub>4</sub> | 1.8                                    | -              | ≈0              | Infinite               |



Table S5. The cRED details of structural refinement for Na-PHI-DH.

| Sample                                      | Na-PHI-DH  |
|---------------------------------------------|------------|
| Tilt range (°)                              | -63.2~57.2 |
| Exposure time/frame (s)                     | 0.3        |
| Number of frames                            | 266        |
| Crystal system                              | Monoclinic |
| Space group                                 | $P2_1/m$   |
| $a$ (Å)                                     | 8.1        |
| $b$ (Å)                                     | 13.1       |
| $c$ (Å)                                     | 8.1        |
| $\alpha$ (°)                                | 90.0       |
| $\beta$ (°)                                 | 106.7      |
| $\gamma$ (°)                                | 90.0       |
| $V$ (Å <sup>3</sup> )                       | 822.8      |
| Resolution (Å)                              | 0.95       |
| Completeness (%)                            | 86         |
| $R_{int}$ (%)                               | 18.06      |
| Unique Reflections $F_o > 4\text{sig}(F_o)$ | 555        |
| Parameters                                  | 143        |
| Restraints                                  | 2          |
| $R_1$                                       | 0.1695     |
| GOF                                         | 1.508      |
| CCDC number                                 | 2402481    |

Table S6. The ion occupancy and multiplicity at different 8-rings in PHI-type zeolites.

| Samples   | Site I             |                    | Site II            |                    | Site III           |                    | Site IV            |                    | Total atom per unit cell |
|-----------|--------------------|--------------------|--------------------|--------------------|--------------------|--------------------|--------------------|--------------------|--------------------------|
|           | Occ <sup>[a]</sup> | Mul <sup>[b]</sup> |                          |
| Na-PHI-DH | 0.42               | 2                  | 1.00               | 2                  | 0.46               | 4                  | 0.61               | 2                  | 5.9                      |
| K-PHI-DH  | 0.73               | 2                  | 0.86               | 2                  | 0.50               | 4                  | 0.27               | 2                  | 5.72                     |

<sup>[a]</sup> refers to occupancy.

<sup>[b]</sup> refers to multiplicity.

Table S7. The cRED details of structural refinement for K-PHI-DH.

| Sample                                      | K-PHI-DH   |
|---------------------------------------------|------------|
| Tilt range (°)                              | -69.9~37.4 |
| Exposure time/frame (s)                     | 0.3        |
| Number of frames                            | 239        |
| Crystal system                              | Monoclinic |
| Space group                                 | $P2_1/m$   |
| $a$ (Å)                                     | 8.3        |
| $b$ (Å)                                     | 13.5       |
| $c$ (Å)                                     | 8.3        |
| $\alpha$ (°)                                | 90.0       |
| $\beta$ (°)                                 | 108.2      |
| $\gamma$ (°)                                | 90.0       |
| $V$ (Å <sup>3</sup> )                       | 875.7      |
| Resolution (Å)                              | 0.84       |
| Completeness (%)                            | 73.3       |
| $R_{int}$ (%)                               | 10.33      |
| Unique Reflections $F_o > 4\text{sig}(F_o)$ | 810        |
| Parameters                                  | 144        |
| Restraints                                  | 1          |
| $R_1$                                       | 0.1655     |
| GOF                                         | 1.687      |
| CCDC number                                 | 2385939    |

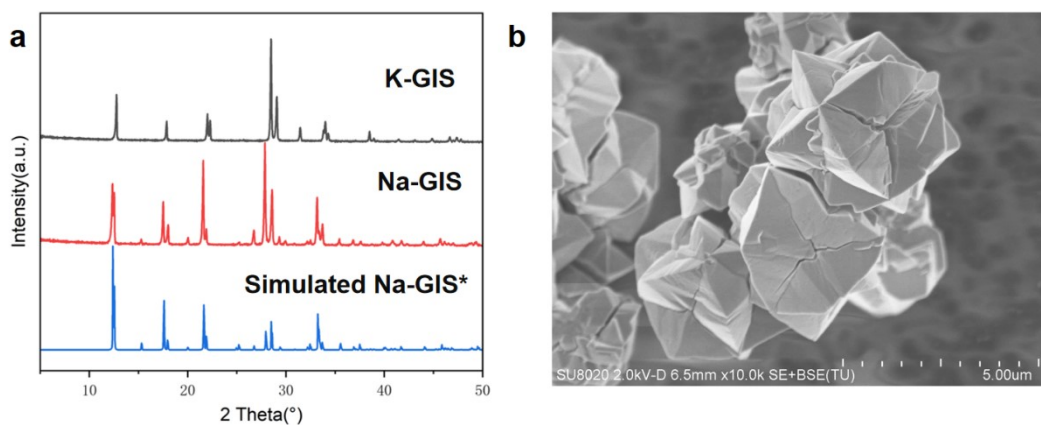

Fig. S1. (a) PXRD patterns of **GIS**-type zeolites. (b) SEM image of as-synthesized Na-GIS.

\*: The simulated PXRD pattern of Na-GIS is derived from the reported structure in the reference.<sup>5</sup>

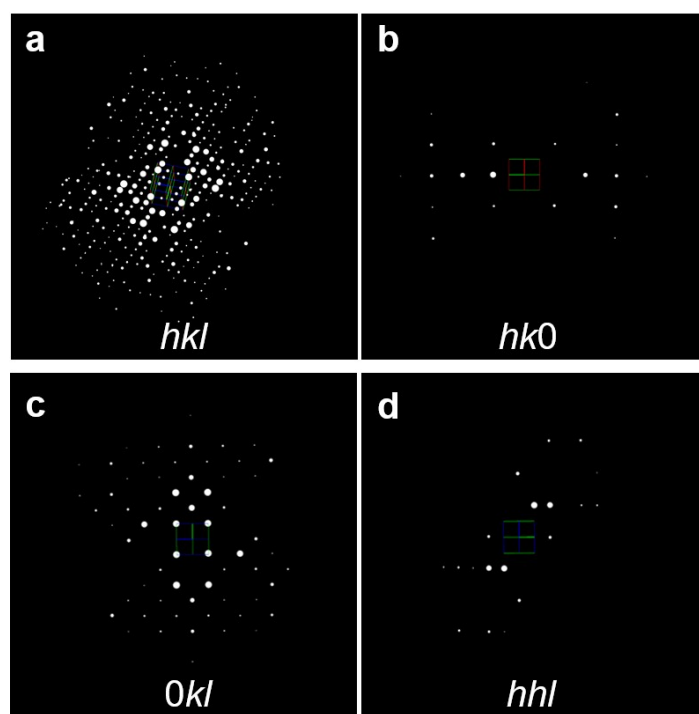

Fig. S2. (a) 3D reciprocal lattice of K-GIS-DH. (b-d) Three slices of  $hk0$ ,  $0kl$ , and  $hhl$  extracted from the reconstructed reciprocal lattice.

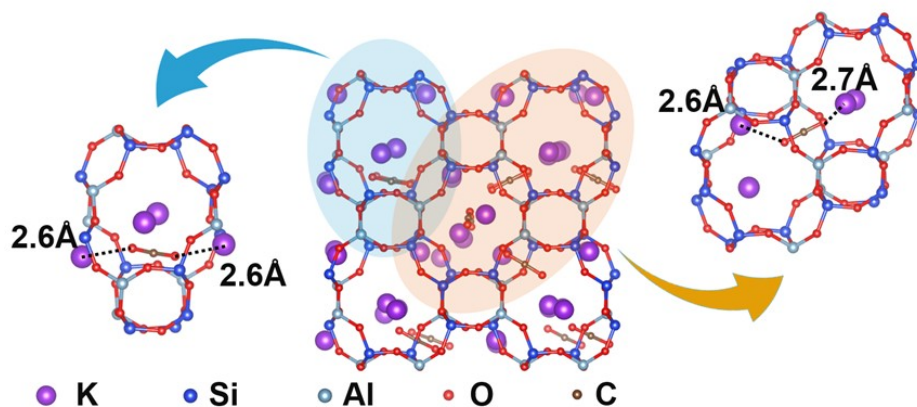

Fig. S3. CO<sub>2</sub> adsorption sites in K-GIS by theoretical calculation.

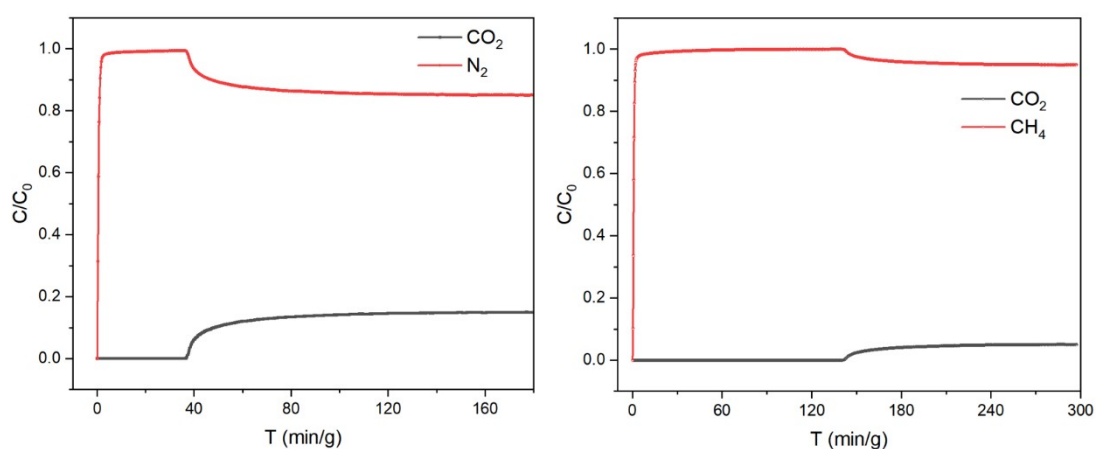

Fig. S4. Experimental binary breakthrough curves for a gas mixture of CO<sub>2</sub>/N<sub>2</sub> (15/85, v/v) (left) and CO<sub>2</sub>/CH<sub>4</sub> (5/95, v/v) (right) on K-GIS at 25 °C and 1 bar with a total flow rate of 5 ml/min.

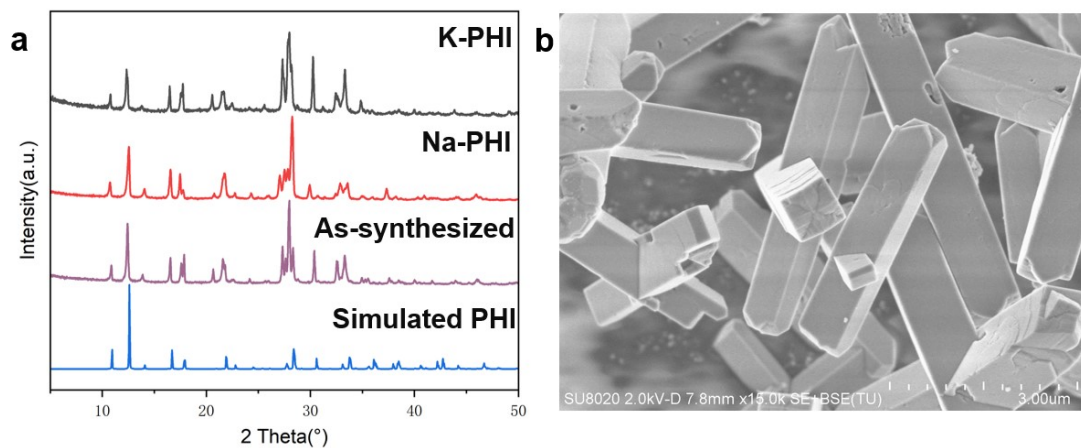

Fig. S5. (a) PXRD patterns of **PHI**-type zeolites. (b) SEM image of as-synthesized PHI.

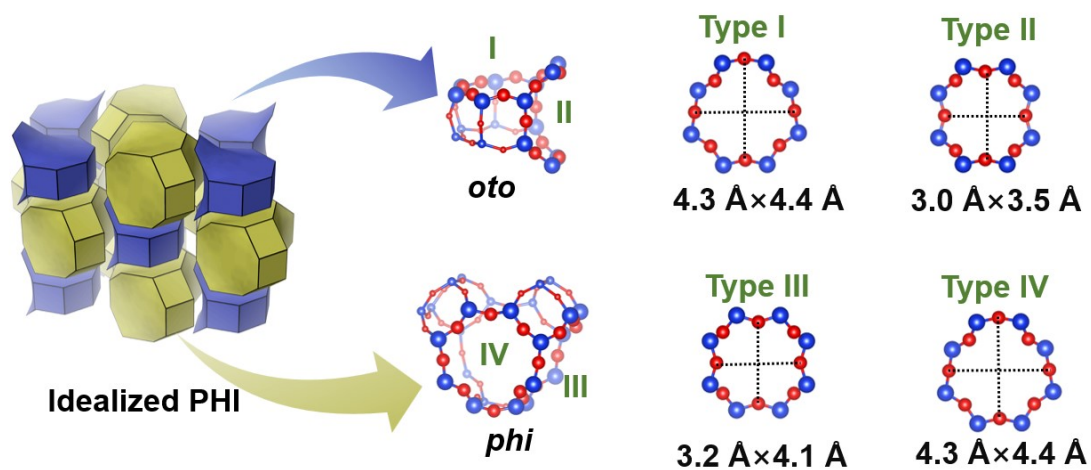

Fig. S6. The tiling structure of idealized **PHI**-type framework (left), *oto* and *phi* CBUs (middle), 8-ring pore openings (right).

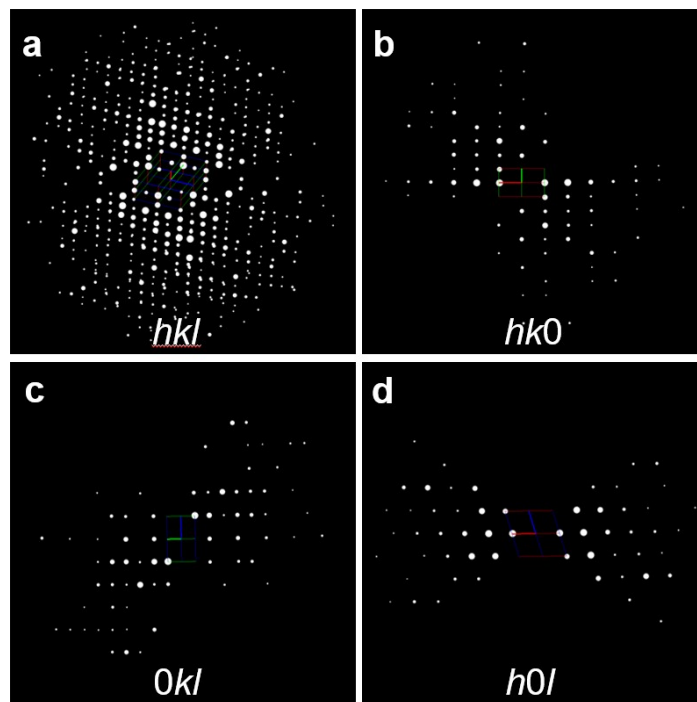

Fig. S7. (a) 3D reciprocal lattice of Na-PHI-DH. (b-d) Three slices of  $hk0$ ,  $0kl$ , and  $h0l$  extracted from the reconstructed reciprocal lattice.

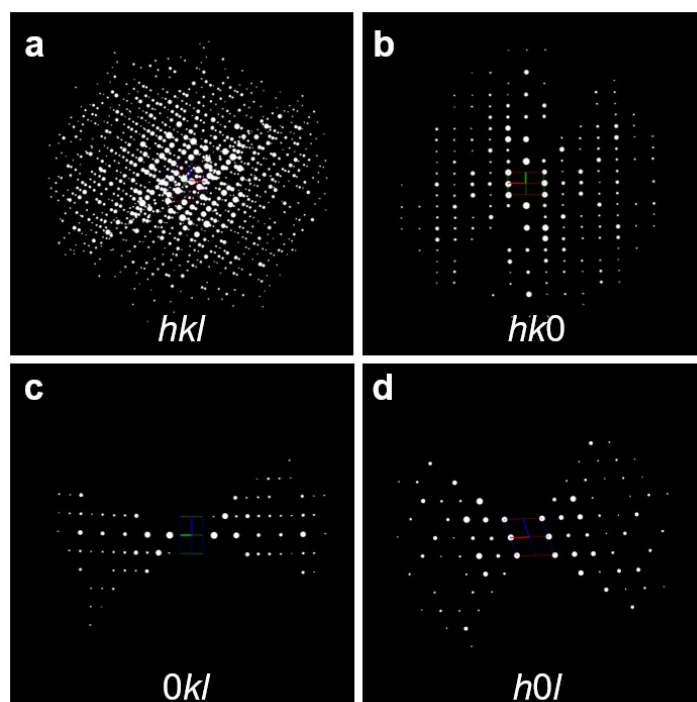

Fig. S8. (a) 3D reciprocal lattice of K-PHI-DH. (b-d) Three slices of  $hk0$ ,  $0kl$ , and  $h0l$  extracted from the reconstructed reciprocal lattice.

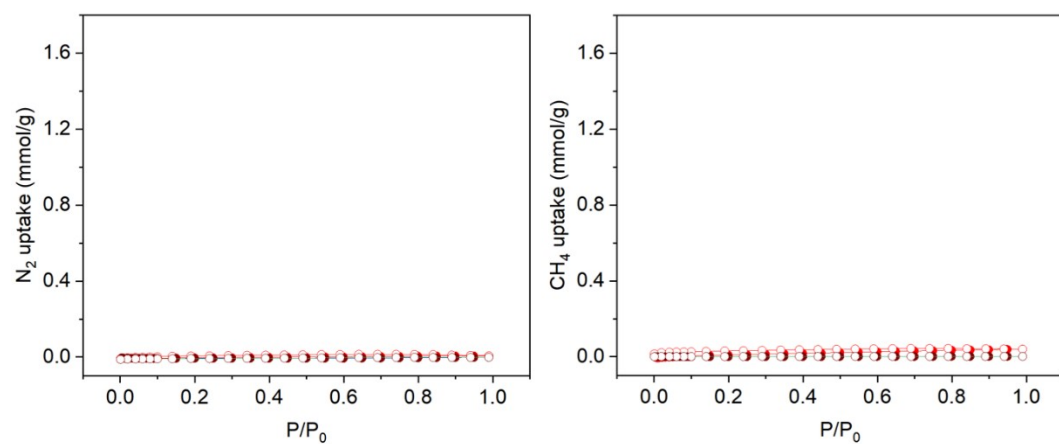

Fig. S9. N<sub>2</sub> (left) and CH<sub>4</sub> (right) adsorption isotherms of K-GIS (brown) and K-PHI (red) at 25 °C.



## Reference

1. M. D. Oleksiak, A. Ghorbanpour, M. T. Conato, B. P. McGrail, L. C. Grabow, R. K. Motkuri and J. D. Rimer, *Chem. Eur. J*, 2016, **22**, 16078-16088.
2. W. Kabsch, *Acta Crystallogr., Sect. D: Biol. Crystallogr.*, 2010, **66**, 125-132.
3. G. M. Sheldrick, *Acta Crystallogr., Sect. A: Found. Crystallogr.*, 2007, **64**, 112-122.
4. P. Krokidas, E. D. Skouras, V. Nikolakis and V. N. Burganos, *Mol. Simul.*, 2008, **34**, 1299-1309.
5. S. Hansen, U. Hakansson and L. Falth, *Acta Crystallogr. C Struct. Chem.*, 1990, **46**, 1361-1362.
